# Supplementary material for: Biodiversity stabilizes plant communities through statistical-averaging effects rather than compensatory dynamics
Source: Springer Nature journal article supplement (doi:10.1038/s41467-022-35514-9), 2022-12-17
Supplement: MOESM1 [file 41467_2022_35514_MOESM1_ESM.pdf]

## Supplementary Information

### **Biodiversity stabilizes plant communities through statistical-averaging effects rather than compensatory dynamics**

Lei Zhao<sup>1,\*</sup>, Shaopeng Wang<sup>2,\*</sup>, Ruohong Shen<sup>1</sup>, Ying Gong<sup>1</sup>, Chong Wang<sup>1,\*</sup>, Pubin Hong<sup>2</sup>,  
and Daniel C. Reuman<sup>3</sup>

<sup>1</sup> *Beijing Key Laboratory of Biodiversity and Organic Farming, College of Resources and Environmental Sciences, China Agricultural University, Beijing 100193 China*

<sup>2</sup> *Institute of Ecology, Key Laboratory for Earth Surface Processes of the Ministry of Education, College of Urban and Environmental Sciences, Peking University, Beijing 100871 China*

<sup>3</sup> *Department of Ecology and Evolutionary Biology and Center for Ecological Research, University of Kansas, Higuchi Hall, 2101 Constant Avenue, Lawrence, Kansas 66047 USA*

\*Corresponding authors: Lei Zhao (lei.zhao@cau.edu.cn), Shaopeng Wang (shaopeng.wang@pku.edu.cn), and Chong Wang (wangchong@cau.edu.cn)

**Supplementary Table 1: Significance of compensatory effects (*CPE*).** Within each plot, the significance of *CPE* was assessed as compared to asynchronous surrogates (Methods). Each plot was deemed to have significantly compensatory dynamics (*CPE* significantly greater than 1), or significantly synchronous dynamics (*CPE* significantly less than 1), or neither.

| Dataset                                     | Site   | Plots | Proportion of plots showing significantly compensatory dynamics | Nonsignificance | Proportion of plots showing significantly synchronous dynamics |
|---------------------------------------------|--------|-------|-----------------------------------------------------------------|-----------------|----------------------------------------------------------------|
| Plant Survey Dataset                        | JRG    | 18    | 100%                                                            | 0%              | 0%                                                             |
|                                             | KBS    | 30    | 30%                                                             | 70%             | 0%                                                             |
|                                             | HAY    | 13    | 46.2%                                                           | 53.8%           | 0%                                                             |
|                                             | JRN    | 47    | 12.5%                                                           | 83.3%           | 4.2%                                                           |
|                                             | KNZ    | 20    | 5%                                                              | 90%             | 5%                                                             |
|                                             | SEV    | 22    | 0%                                                              | 90.9%           | 9.1%                                                           |
|                                             | CDR    | 5     | 0%                                                              | 100%            | 0%                                                             |
|                                             | SGS    | 100   | 14%                                                             | 86%             | 0%                                                             |
|                                             | VC     | 6     | 66.7%                                                           | 33.3%           | 0%                                                             |
| Biodiversity-manipulated Experiment Dataset | BigBio | 122   | 4.8%                                                            | 86.4%           | 8.8%                                                           |
|                                             | BioCON | 42    | 30.5%                                                           | 69.5%           | 0%                                                             |

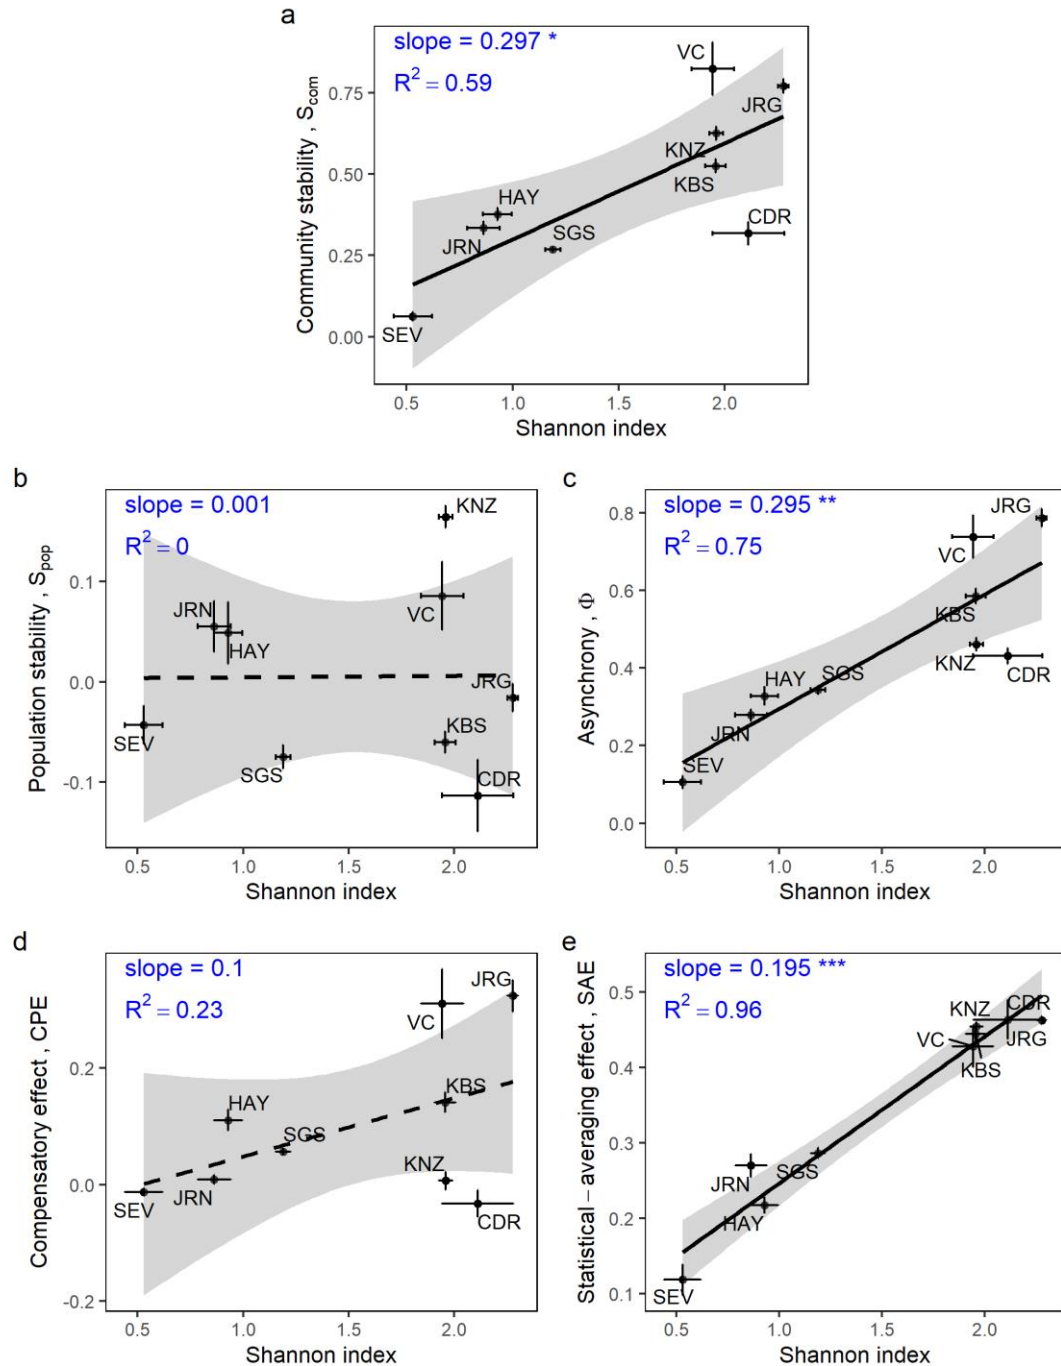

**Supplementary Fig. 1: Effects of the Shannon index on community stability and its components across the nine sites in the plant survey dataset.** Relationships are shown between the Shannon index and (a) community stability ( $p = 0.015$ ), (b) population stability ( $p = 0.979$ ), (c) asynchrony ( $p = 0.003$ ), (d) the compensatory effect ( $p = 0.189$ ), and (e) the statistical-averaging effect ( $p < 0.001$ ). All values (including standard error) are  $\log_{10}$  transformed except for the Shannon index. Regression and significance results formatted as in Fig. 2.

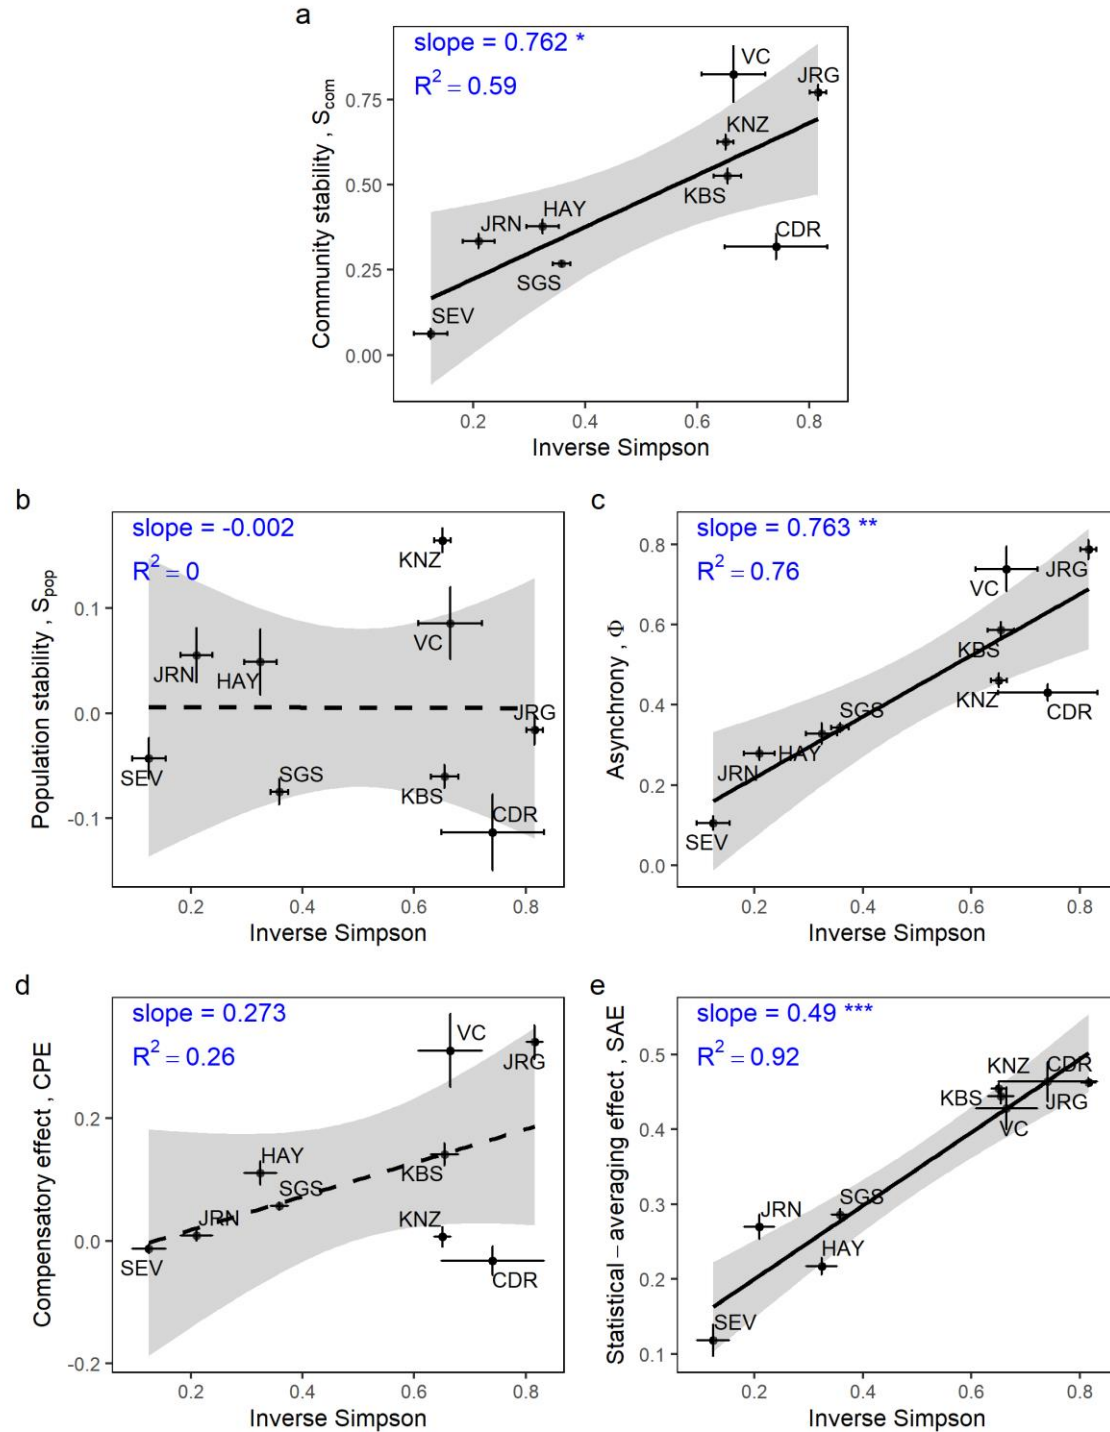

**Supplementary Fig. 2: Effects of the inverse of Simpson's index on community stability and its components across the nine sites in the plant survey dataset.** Relationships are shown between the inverse of Simpson's index and (a) community stability ( $p = 0.016$ ), (b) population stability ( $p = 0.991$ ), (c) asynchrony ( $p = 0.002$ ), (d) the compensatory effect ( $p = 0.160$ ), and (e) the statistical-averaging effect ( $p < 0.0001$ ). All values (including standard error) are  $\log_{10}$  transformed. Regression and significance results formatted as in Fig. 2.

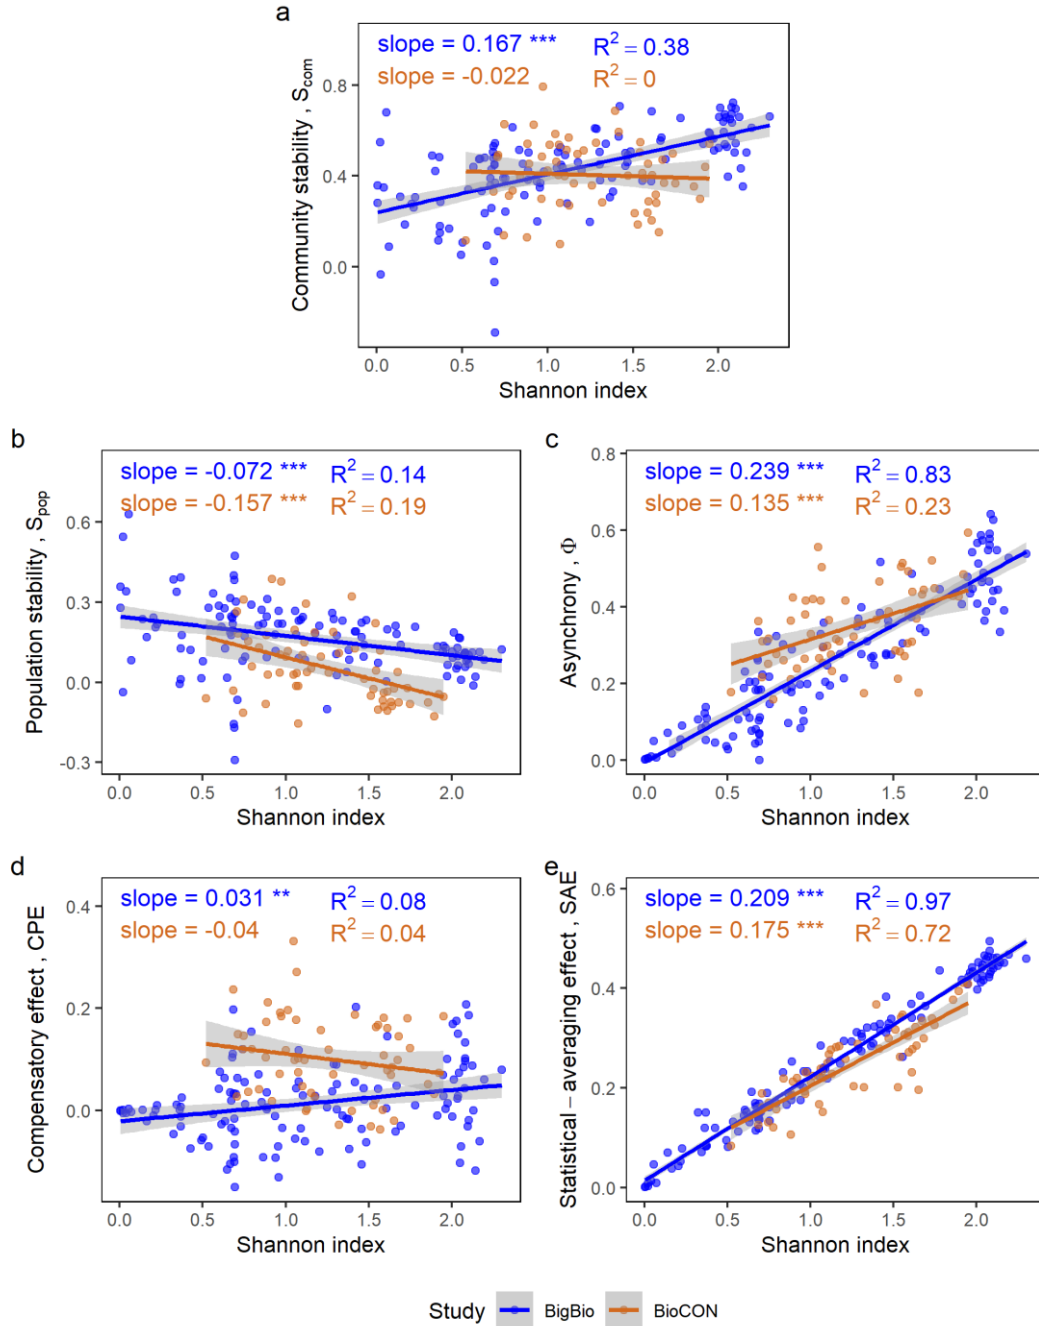

**Supplementary Fig. 3: Effects of the Shannon index on community stability and its components in the biodiversity-manipulated experimental dataset.** Relationships are shown between the Shannon index and (a) community stability ( $p < 0.001$  for BigBio and  $p = 0.675$  for BioCON), (b) population stability ( $p < 0.001$  for both studies), (c) asynchrony ( $p < 0.001$  for both studies), (d) the compensatory effect ( $p = 0.002$  for BigBio and  $p = 0.147$  for BioCON), and (e) the statistical-averaging effect ( $p < 0.001$  for both studies) within two studies (indicated by different colours). All values are  $\log_{10}$  transformed except for the Shannon index. Regression and significance results formatted as in Fig. 2.

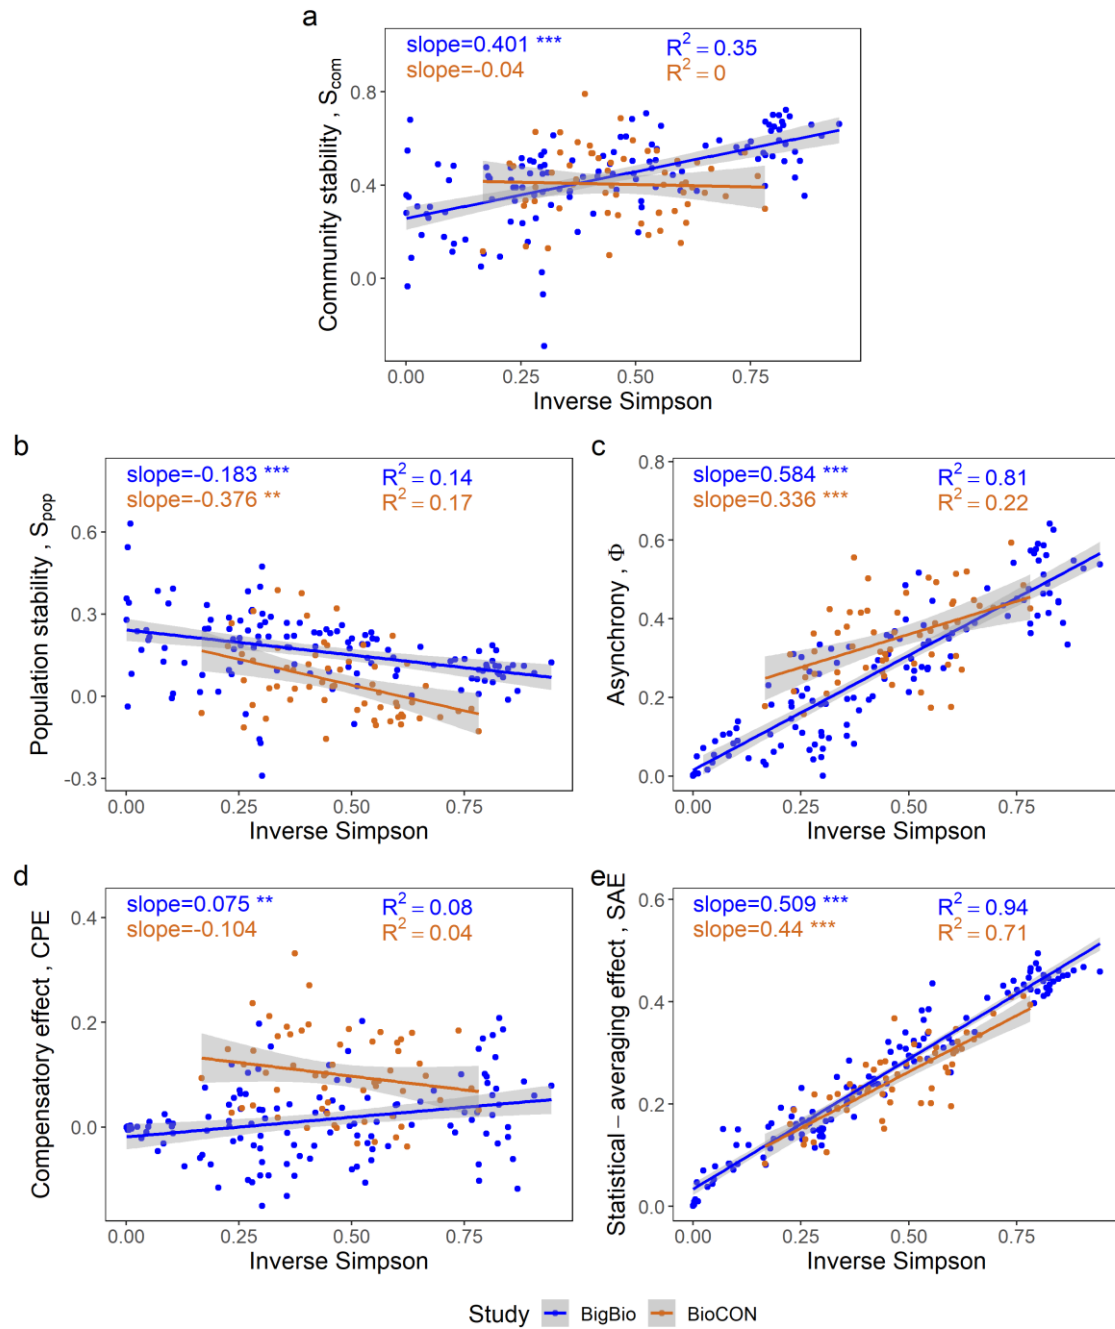

**Supplementary Fig. 4: Effects of inverse Simpson's index on community stability and its components in the biodiversity-manipulated experimental dataset.** Relationships are shown between the inverse Simpson's index and (a) community stability ( $p < 0.001$  for BigBio and  $p = 0.769$  for BioCON), (b) population stability ( $p < 0.001$  for BigBio and  $p = 0.001$  for BioCON), (c) asynchrony ( $p < 0.001$  for both studies), (d) the compensatory effect ( $p = 0.002$  for BigBio and  $p = 0.147$  for BioCON), and (e) the statistical-averaging effect ( $p < 0.001$  for both studies) within two studies (indicated by different colours). All values are log10 transformed. Regression and significance results formatted as in Fig. 2.

Asynchrony

Compensatory effect

$$S_{\text{com}} = CPE_{\text{int}} \times CPE_{\text{env}} \times SAE \times S_{\text{pop}}$$

Portfolio effect as defined by Doak *et al.*<sup>19</sup>

Portfolio effect as defined by Tilman<sup>20</sup>

The diagram illustrates the decomposition of community stability ( $S_{\text{com}}$ ) into four components. A green bracket above the equation groups  $CPE_{\text{int}}$  and  $CPE_{\text{env}}$  under the label 'Asynchrony'. A blue bracket below the equation groups  $CPE_{\text{int}}$  and  $CPE_{\text{env}}$  under the label 'Compensatory effect'. A red bracket below the equation groups  $CPE_{\text{env}}$  and  $SAE$  under the label 'Portfolio effect as defined by Doak *et al.*<sup>19</sup>'. A purple line points from  $SAE$  to the label 'Portfolio effect as defined by Tilman<sup>20</sup>'.

**Supplementary Fig. 5: Summary equation of our full decomposition of community stability, and ecological meanings of components.**

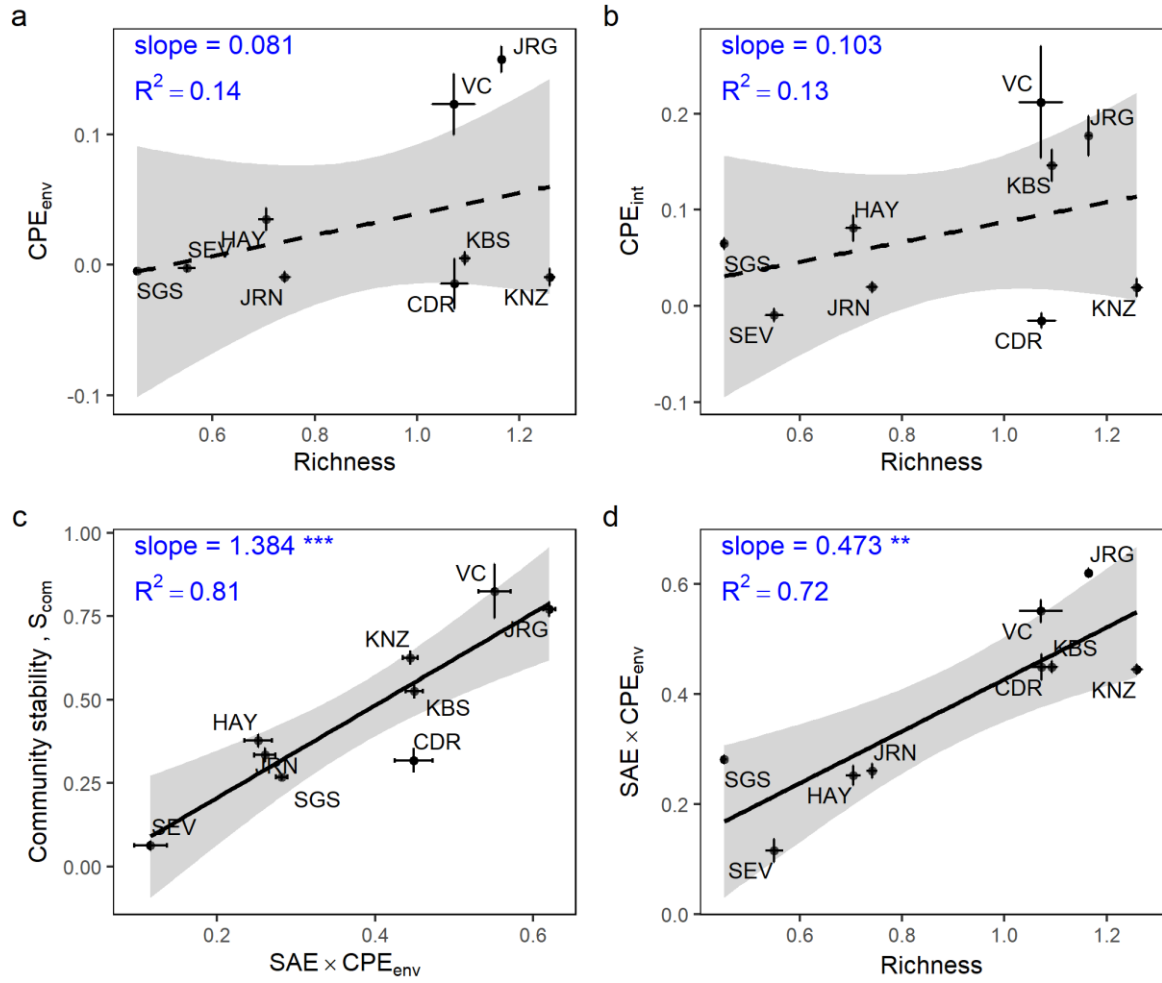

**Supplementary Fig. 6: Relationships involving compensatory effects due to joint responses to environment fluctuations ( $CPE_{env}$ ) and due to species interactions ( $CPE_{int}$ ) across the nine sites in the plant survey dataset.** Relationships are shown between (a)  $CPE_{env}$  and richness ( $p = 0.329$ ), (b)  $CPE_{int}$  and richness ( $p = 0.342$ ), (c) community stability and the product of statistical averaging effect and  $CPE_{env}$  ( $p < 0.001$ ), and (d) richness and the product of statistical averaging effect and  $CPE_{env}$  ( $p = 0.004$ ). All values (including standard errors) are  $\log_{10}$  transformed. Regression and significance results formatted as in Fig. 2.



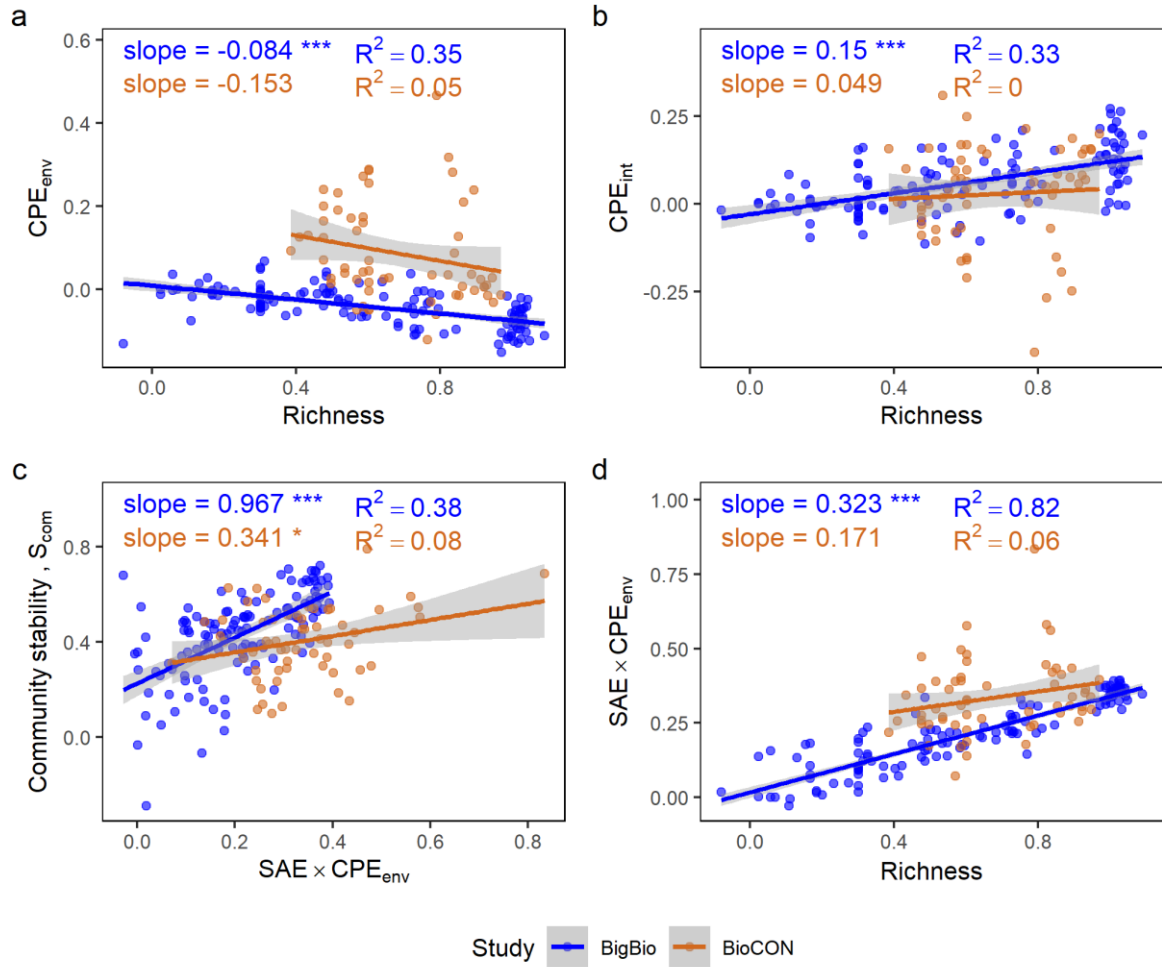

**Supplementary Fig. 7: Relationships involving compensatory effects due to joint responses to environment fluctuations ( $CPE_{env}$ ) and due to species interactions ( $CPE_{int}$ ) within studies of the biodiversity-manipulated experimental dataset.** Relationships are shown between (a)  $CPE_{env}$  and richness ( $p < 0.001$  for BigBio and  $p = 0.094$  for BioCON), (b)  $CPE_{int}$  and richness ( $p < 0.001$  for BigBio and  $p = 0.653$  for BioCON), (c) community stability and the product of statistical averaging effect and  $CPE_{env}$  ( $p < 0.001$  for BigBio and  $p = 0.029$  for BioCON), and (d) richness and the product of statistical averaging effect and  $CPE_{env}$  ( $p < 0.001$  for BigBio and  $p = 0.072$  for BioCON). All values (including standard errors) are  $\log_{10}$  transformed. Regression and significance results formatted as in Fig. 2.
